# Supplementary material for: BMP signaling maintains auricular chondrocyte identity and prevents microtia development by inhibiting protein kinase A
Source: PubMed Central journal article supplement (PMC11062634; doi:10.7554/elife.91883), 2024-05-01

Figure 7G

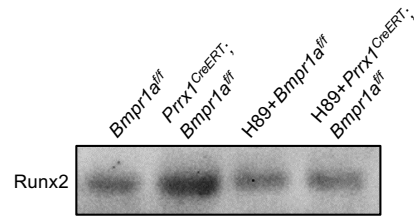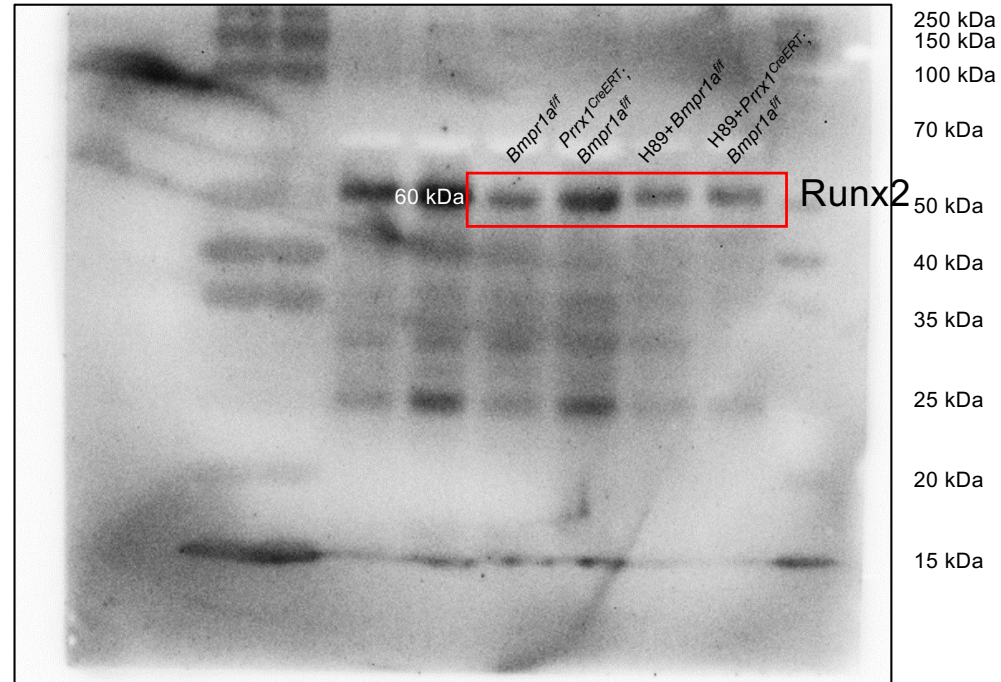

Figure 7G

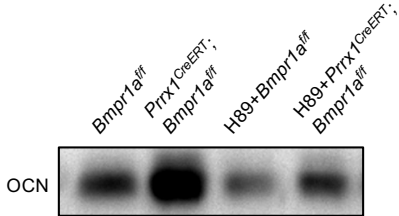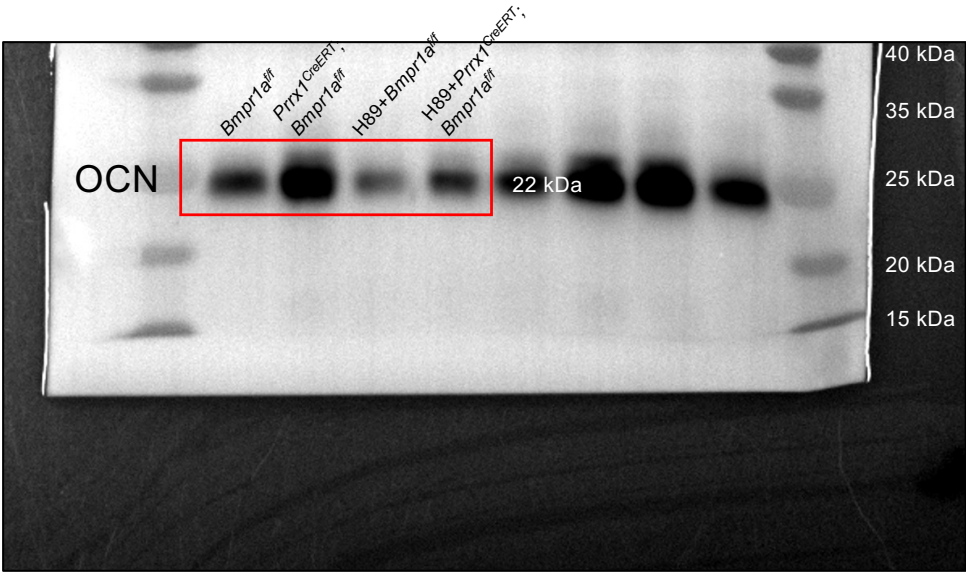

Figure 7G

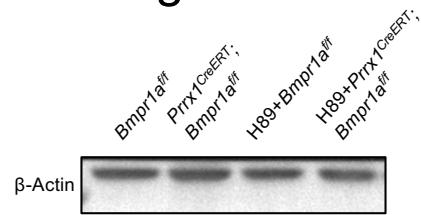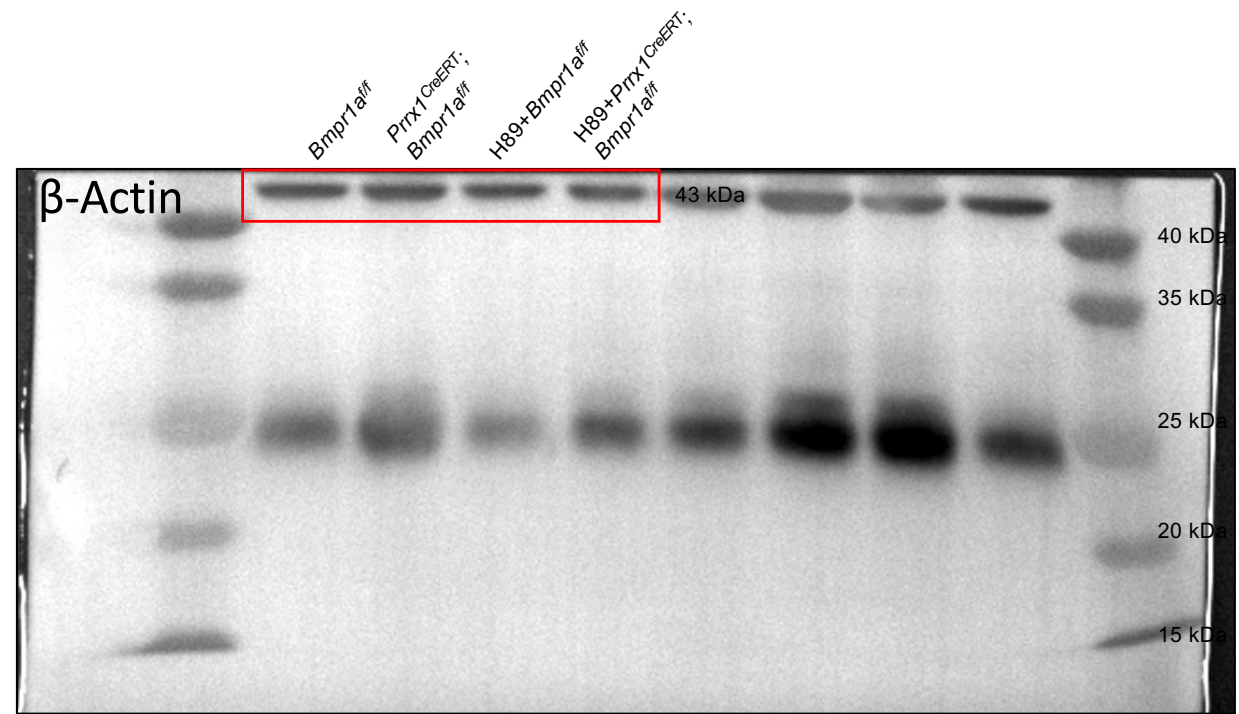

Supplement: elife-91883-fig7-data1.pdf [file elife-91883-fig7-data1.pdf]
