# Supplementary material for: BMP signaling maintains auricular chondrocyte identity and prevents microtia development by inhibiting protein kinase A
Source: eLife journal article supplement (doi:10.7554/elife.91883), 2023-12-19

Figure 6B

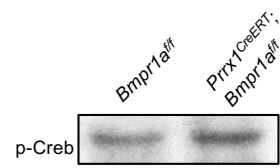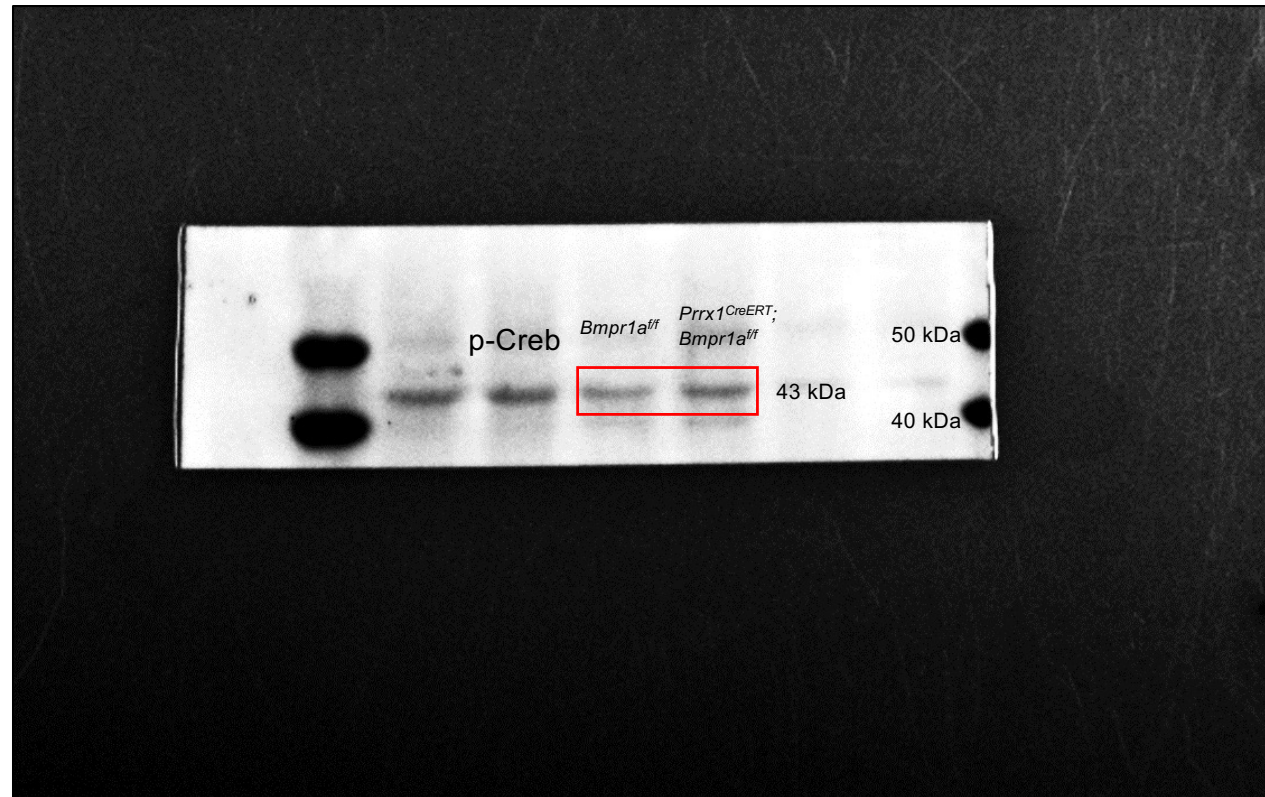

Figure 6B

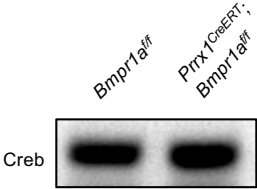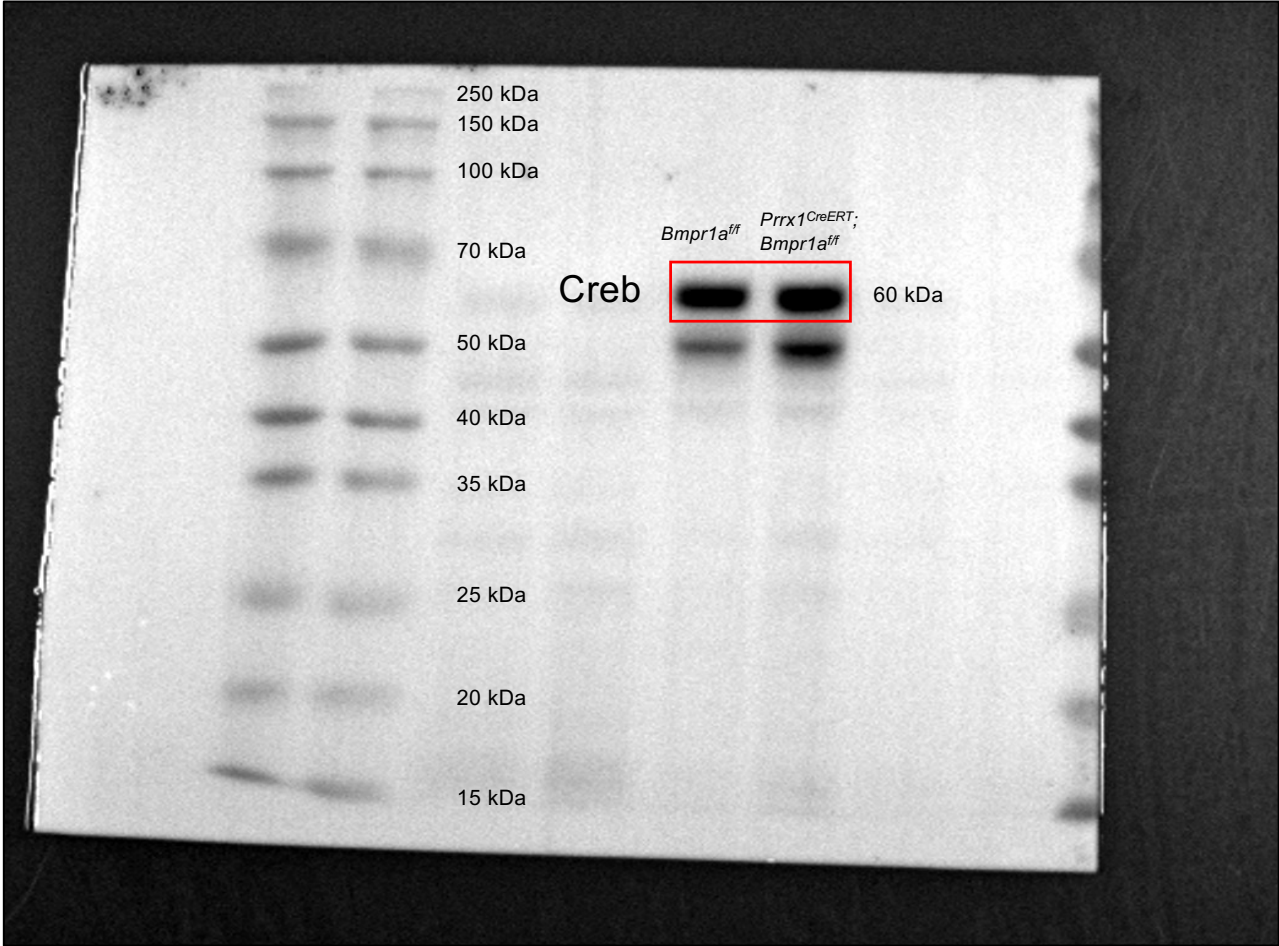

Figure 6B

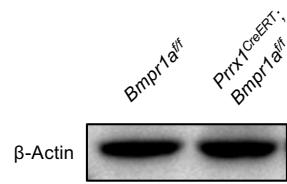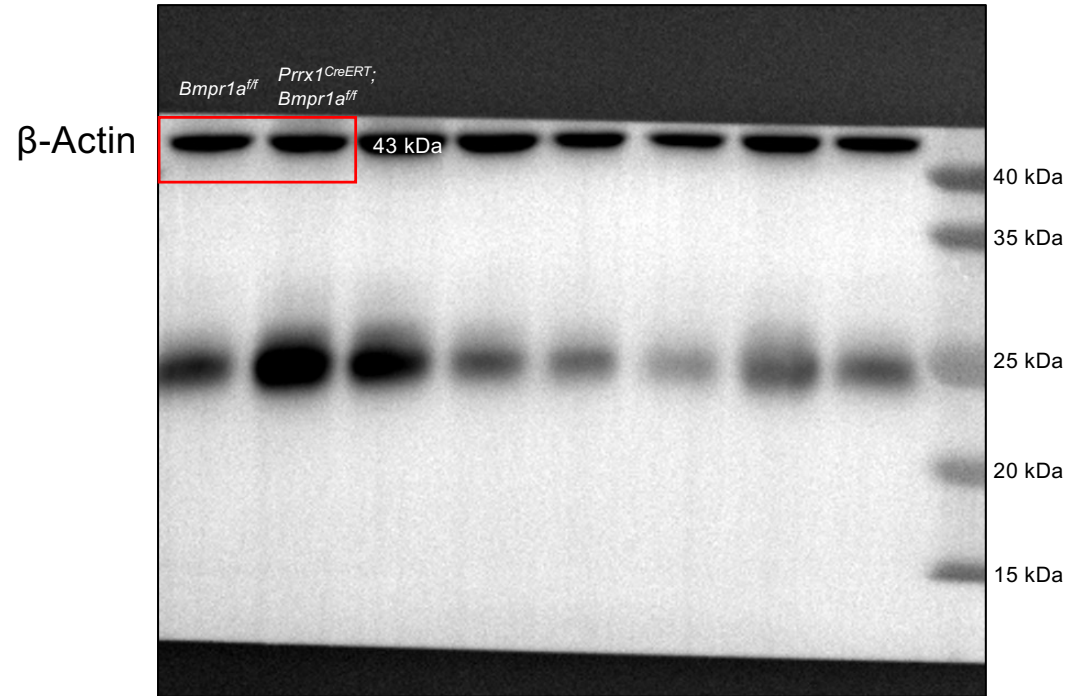

Supplement: fig6-data1 [file elife-91883-fig6-data1-v1.pdf]
