# Supplementary material for: BMP signaling maintains auricular chondrocyte identity and prevents microtia development by inhibiting protein kinase A
Source: eLife. 2024 May 1;12:RP91883. doi: 10.7554/eLife.91883 (PMC11062634; doi:10.7554/eLife.91883)
Supplement: Supplementary file 1. [file elife-91883-supp1.xlsx]

## Sheet: Figure source data
Figure 2B
	Relative Bmpr1a level
Bmpr1af/f	1.15491	0.871221	0.993858
Prrx1CreERT; Bmpr1af/f	0.614625	0.471211	0.424679
Figure 2C
	Relative proportions of ear area
Bmpr1af/f	0.933504	0.907907	1.00117	1.15742
Prrx1CreERT; Bmpr1af/f	0.405542	0.421346	0.459852	0.515275
Figure 2D
	Thickness of the cartilage (μm)
Bmpr1af/f Distal	30.7757	33.5107	32.512	29.5261	31.763	31.763	29.7907	32.0419	30.5196	30.7757	30.0879	29.7907	29.2948	28.9353	30.5196	25.9615	20.2485	18.6815	22.8035	25	25.9615	24.7386	25.7099	25.7099	26.3059	23.5372	24.3311	27.2947	26.4764	28.2843	27.2947	25.1794	25.02	26	25	27	23.0868	25.1794	27	28.0178	29	28.0178	28.0713	27.074	26.0768
Bmpr1af/f Middle	41.3785	39.2098	39.0895	38.1957	41.9936	37.8655	36.8286	36.8854	37.8655	36.8428	38.9285	38.0722	42.2545	41.2392	39.2098	45.2769	47.5079	46.6905	48.1664	47.5079	42.19	46.5296	46.2385	45.2217	44.7214	44.1475	45.2769	47.3814	46.6905	45.2769	40.2616	35.9027	38.6394	36.8782	37.855	38.833	38.833	39.8121	43.566	42.5793	41.7732	34.4383	35.3553	34.9285	34.8855
Bmpr1af/f Proximal	55.2524	54.2296	57.3255	56.266	54.2199	57.2981	55.243	55.2524	58.312	56.2753	55.2524	57.2981	50.1279	51.1509	55.2524	64.0781	64.4748	60.4152	59.6154	56.648	65.7951	66.3099	60.0083	58.6003	59.5063	59.0593	59.1692	59.1692	65.192	61.0573	64.2806	65.2763	60.2993	59.6657	61.131	58.9406	55.3173	60.4152	62.7694	63.561	62.6498	65.307	64.8845	64.4127	63.2851
Prrx1CreERT; Bmpr1af/f Distal	23.3284	22.3431	20.3835	21.3612	20.3835	22.6455	23.3284	25.3081	21.3612	21.8696	27.5456	23.7287	27.6972	25.5755	23.5294	24.6982	26.9258	22.8035	21.1896	25.9422	28.4429	25.318	25.318	25.0799	26.3059	24.0416	25.9615	24.0416	26.2488	28.1603	22.2036	24	26.3059	24.3311	24.3311	23.5372	23.0868	24.1661	25.4951	25.0799	24.3311	29.8329	25.9615	26.0768	26.5707
Prrx1CreERT; Bmpr1af/f Middle	35.3201	33.5107	32.512	34.3892	34.6167	34.0067	31.73	33.6509	32.6886	31.0634	39.3696	36.1547	38.4415	34.3892	38.8881	39.1152	36.0139	42.2966	39.3192	39.3192	35.6931	38.833	38.833	39.8121	36.4006	37.9473	39.8497	44.5982	36.2353	33.6155	39.598	37.4833	36.8782	39.6989	43.2782	33.2866	39.4462	39.6611	39.4462	39.598	34.4819	37.0135	37.2022	38.4188	37.8021
Prrx1CreERT; Bmpr1af/f Proximal	57.3712	55.8459	53.5987	56.7383	57.5987	57.6623	57.5987	57.3712	56.9408	52.7326	56.6368	57.0694	58.0602	59.0521	58.321	54.1202	53.6656	53.6656	51.8845	55.5428	58.1808	57.2713	56.0803	61.3514	58.8727	59.2368	62.3939	59.808	61.0983	64.5136	63.5689	58.8727	62.7694	66.3099	63.1348	62.434	67.1193	61.8547	63.6553	65.8559	65.1153	65.192	62.0322	63.3246	65.307
Figure 2D
	Chondrocyte size (μm2)
Bmpr1af/f Distal	2376	751	1632	354	401	1938	3325	5104	918	4882	3394	1923	1535	725	1727	879	5361	1161	104	2874	1910	5360	284	3163	4816	65	2160	3005	792	80	59	971	2280	453	431	4008	2763	2721	150	3492	2068	2216	4398	1053	2013	1820	1547	3615	460
Bmpr1af/f Middle	884	2258	7855	1145	5971	920	756	2105	2224	4834	6375	2613	3898	1756	3463	713	1420	4877	1181	6016	2812	4088	289	5459	1230	5996	87	3430	2984	3959	875	1567	2339	5944	3840	1961	1890	3493	137	309	4552	1137	5376	1928	1119	1471	7038	803	813
Bmpr1af/f Proximal	2439	10405	4254	746	242	911	5402	5553	708	8038	1824	4267	9841	3698	189	766	9534	1562	1058	3971	1321	10420	6304	426	2072	275	188	494	1012	6440	3564	6068	249	1928	5024	4696	1304	11510	3896	511	975	7064	3615	7350	3507	425	5293	6162	7171
Prrx1CreERT; Bmpr1af/f Distal	1008	2043	897	867	1072	1089	1751	3856	3051	239	1869	1426	673	366	467	1202	480	151	1026	445	884	523	1579	736	1972	996	1109	252	3797	547	804	1509	538	693	339	439	1074	834	652	1556	962	2585	971	2463	651	785	318	1108	698
Prrx1CreERT; Bmpr1af/f Middle	1761	3864	2566	2298	2975	716	529	2685	2021	517	1268	503	3169	2225	95	2149	392	2259	2293	459	346	2992	1893	530	873	1397	845	1025	346	2852	1174	3990	749	3043	542	3314	1731	3013	2171	2127	2343	75	1912	1593	422	1840	564	1732	1153
Prrx1CreERT; Bmpr1af/f Proximal	9968	2486	8439	5800	1123	4353	6341	8894	2051	1246	761	9508	8405	176	5062	1837	1616	3055	12718	1137	2032	5950	5827	3939	10241	5106	4653	8488	3382	4031	10018	1769	1141	219	1252	1427	4685	637	426	4604	10090	12021	6011	2117	1760	1736	5600	6003	8068
Figure 2- figure supplement 1B
	Body Weight (g)
Bmpr1af/f	25.9	26.9	26.7	25.7
Prrx1CreERT; Bmpr1af/f	21.9	21.5	21.8	24.3
Figure 2-figure supplement 4B
	Fold change (p-Smad1/5/9/Smad1)
Distal	1	1	1
Middle	0.676999	0.508055	0.750216
Proximal	0.502548	0.33597	0.524569
Figure 2-figure supplement 4C
	Ear piercing area change (%)
Day	0				3				5				9
Distal	100	100	100	100	100	100	100	100	100	100	100	100	100	100	100	100
Middle	100	100	100	100	77.963	100.825	66.2359	73.3631	89.6925	52.6139	81.4711	77.8615	67.3726	41.6431	4.78332	37.135
Proximal	100	100	100	100	0	0	16.0364	19.6775	0	0	0	0	0	0	0	0
Figure 2-figure supplement 5C
		Relative Bmpr1a level
Bmpr1af/f	0.998461	0.857244	1.16833
Col1a2-CreERT; Bmpr1af/f	0.483899	0.477237	0.398535
Figure 2-figure supplement 5E1
	Thickness of the cartilage (μm)
Bmpr1af/f Distal	31.3464	32.3518	31.8118	28.9798	29.9944	30.891	31.8283	30.891	29.8717	30.891	30.8059	33.8735	33.8735	31.9107	32.8029	29.7837	34.8963	32.8029	32.8509	30.7548	32.0624	32.0156	29.0172	28	31	32.1403	31.257	28.2843	34.0147	29.0172	34.0588	34	30	30.0167	31.0161	30.5941
Bmpr1af/f Middle	42.1089	45.4176	46.8231	46.6777	44.8967	46.2389	46.0123	40.2946	42.5535	45.7273	50.352	51.2473	47.9265	47.6969	46.205	49.4194	52.2274	47.664	49.3559	47.2676	37.1214	35.1283	37	38.0526	39.0128	39	38.0132	39	40.0125	38.0132	36.1248	41.3038	41.4367	40.4475	39.4588	37.3363
Bmpr1af/f Proximal	69.0797	67.6757	64.622	66.242	69.7711	70.2282	71.0211	67.231	72.8011	69.3397	72.111	68.9638	70	68.4105	62.7694	61.2209	64.8999	60.4649	67.4166	61.6117	65.9242	60.5392	59.0932	58.5918	60.5392	57.3062	57.2451	59.3633	59.203	61.8466	62.3618	58.6941	56.3028	54.2033	62.9365	58.1808
Col1a2-CreERT; Bmpr1af/f Distal	30.1207	29.9637	31.878	31.878	31.9928	33.1507	33.1507	27.1662	26.1725	26.1725	24.0832	24.5153	27.6586	27.8568	27.5136	29.1548	26	28.7924	30.3645	29.1204	29.4109	32.28	32.8938	34.8155	35.7508	33.6681	36.9043	32.0583	32.7693	36.9894	35.5303	35.0404	32.1399	33.1507	33.5278	35.5303
Col1a2-CreERT; Bmpr1af/f Middle	42.9887	44.0599	45.0358	47.1274	44.2023	48.1173	42.0151	35.7351	34.4819	35.4401	36.1386	36.8782	37.108	38.0789	39.0513	38.6394	39.6232	38.6394	40.4475	40.6079	39.3192	38.0526	37.4833	47.9756	44.966	44.1904	43.1954	45.4296	42.9644	43.7616	40.9672	39.549	44.966	44.3088	43.0374	44.0242
Col1a2-CreERT; Bmpr1af/f Proximal	68	72.111	60.1664	62.3939	63.1585	62.2977	63.561	64.846	55.9464	57.7754	63.3246	66.6408	61.2699	61.9839	63.5689	66.4831	63.1585	61.6847	58.6941	56.7274	54.6443	57.3149	66.0076	70.1142	62.0322	66.0303	60	60.0333	64	58.0345	60.1332	62.0322	60.0333	60.0333	60.1332	64.2806
Figure 2-figure supplement 5E2
	Chondrocyte size (μm2)
Bmpr1af/f Distal	3573	2903	4349	382	675	2018	2598	3984	527	2895	3914	3475	2541	2225	2720	2703	378	4499	2521	2310	1282	2118	1992	1430	5055	439	2440	2228	2689	3110	1609	829	1709	4051	1919	2300	489	3679	2983	1563	1108	3642	1814	1821	785	1755	503	3255	1171
Bmpr1af/f Middle	1834	5889	3365	6075	4548	8428	1733	7682	2853	4335	3023	5081	2713	5235	6964	8313	3359	8709	1123	935	6151	3513	1221	4501	2745	2788	3470	1911	3276	2884	2124	816	4759	2552	2459	3709	1130	2936	1599	1041	2921	1497	2920	1047	858	3548	1386	235	3145
Bmpr1af/f Proximal	9592	4019	4837	2509	1103	3355	11473	1498	940	10172	1141	2897	5555	1600	9320	4789	6303	744	3835	2190	603	9207	6427	107	3269	7932	2900	2211	2323	450	598	9716	4193	6114	6274	920	4360	536	695	6061	5993	2896	3022	2881	5002	7548	6744	898	3881
Col1a2-CreERT; Bmpr1af/f Distal	1752	3389	1293	802	706	1625	1176	5320	3159	113	1567	2890	1053	1184	1895	1364	3700	812	2636	163	92	4570	1421	2881	2253	3916	2563	1499	1938	4105	292	560	1521	1303	2381	4927	1010	1911	369	637	835	2132	735	1117	679	665	2816	3908	1578
Col1a2-CreERT; Bmpr1af/f Middle	6779	5040	1395	4180	7286	121	2973	6201	3870	357	1603	328	1718	4375	4530	6787	630	4856	3515	407	196	8457	2163	250	1444	6092	3436	858	1938	3384	7197	4537	2340	7456	4450	1499	1089	4992	510	1514	1727	835	3911	550	7169	795	3952	2389	655
Col1a2-CreERT; Bmpr1af/f Proximal	9420	5654	6182	3739	10028	1515	1628	960	2104	3705	1427	9629	7432	5953	3376	3123	1704	878	609	6607	2770	1993	2726	2729	9119	1300	949	7881	6177	8669	6546	8092	8230	6031	9799	3060	1601	1827	8367	4581	6980	4900	7341	1130	488	553	5587	3503	296
Figure 2-figure supplement 6C
	Relative Bmpr1a level
Bmpr1af/f	0.89675	1.10658	1.00773
Acta2-CreERT; Bmpr1af/f	0.775274	0.601281	0.516239
Figure 2-figure supplement 6E1
	Thickness of the cartilage (μm)
Bmpr1af/f Distal	27.3115	28.3098	28.3098	26.6907	26.7886	29.7003	28.7322	26.6907	25.6703	27.7113	25.6703	25.609	27.6546	28.7322	29.6827	27.6356	28.6774	27.7113	28.7322	27.6356	27.6546	27.6356	28.6774	28.6592	27.9372	27.7113	28.6592	28.7322	30.7233	29.6827	27.6546	30.7062	25.5885	27.7113	30.7062	26.6121
Bmpr1af/f Middle	37.8849	36.8617	36.8617	37.8849	37.8849	37.8849	38.908	40.9417	37.871	40.9417	36.8617	36.9043	35.8824	35.8386	36.8475	42.8667	38.5292	39.1095	39.2298	41.2603	34.8154	40.036	39.7472	38.908	36.9043	36.8617	34.8004	36.8475	36.8617	35.8386	38.8946	40.3748	41.4503	37.0742	36.9043	37.871
Bmpr1af/f Proximal	57.0435	55.8745	54.0155	57.2177	54.8622	56.211	53.8503	53.8503	51.6762	54.5942	53.4696	55.3565	55.3091	56.4527	59.0646	58.6553	60.4669	60.7608	61.3186	61.2245	59.6295	60.1804	59.6295	59.5064	61.5233	61.5573	56.7766	55.912	53.2635	53.2242	53.234	55.1194	59.6295	59.3477	59.3477	59.5504
Acta2-CreERT; Bmpr1af/f Distal	24.0667	21.8584	23.8704	24.0667	27.2836	23.8704	27.2836	26.0686	24.0667	24.8994	26.2086	26.2086	26.2086	27.1684	25.8673	28.7937	30.0898	32.2856	33.29	30.0898	32.4954	32.107	32.6719	32.6719	33.0378	32.6719	31.5651	32.0907	24.5824	27.8149	31.098	31.7468	32.2856	28.9205	32.107	30.2803
Acta2-CreERT; Bmpr1af/f Middle	40.8998	38.8548	38.0528	36.9374	38.8683	38.8548	38.8548	40.8998	40.9509	37.8461	34.1274	33.4935	36.3094	35.5675	34.7197	33.7268	33.4935	37.9978	34.7799	34.3717	36.539	35.213	32.2856	38.8548	38.9086	36.0203	40.9126	42.957	45.0014	42.957	42.9448	40.2037	42.5289	42.2329	41.1038	38.9757
Acta2-CreERT; Bmpr1af/f Proximal	56.5709	58.506	55.4509	54.2308	55.2147	57.2597	54.2019	55.5545	54.4329	55.366	53.6103	54.2019	59.6212	57.5874	56.5616	57.6237	57.3418	50.7965	52.3473	53.0615	55.4509	53.3464	57.5874	56.7922	59.5247	59.7351	52.6362	53.6786	57.8862	56.9852	55.8548	56.4691	61.6557	58.5953	57.9223	58.4255
Figure 2-figure supplement 6E1
	Chondrocyte size (μm2)
Bmpr1af/f Distal	1537	3679	399	4964	1446	1115	887	2577	2460	1247	3408	2311	5861	428	523	3711	4617	3037	627	476	1953	220	4664	689	4771	1450	1666	1002	4146	1131	434	824	4019	2763	2731	3484	1653	2216	4389	1057	2013	1817	1513	3616	480	1466	3902	444	2872
Bmpr1af/f Middle	1303	3168	701	703	1355	2301	1859	1856	5653	2283	409	288	267	693	825	7097	982	2102	5567	6039	3382	3096	3361	393	6683	742	1867	1087	3072	3775	311	3482	2668	3927	2966	675	914	664	1294	4552	1137	5362	1922	1117	1446	7021	789	2162	1251
Bmpr1af/f Proximal	1941	2999	4982	2362	1547	1985	1538	8741	9901	1658	2143	2525	1960	200	1790	6397	1945	4812	3381	7454	168	4943	4789	3379	1337	10218	6755	9954	3943	332	1624	3426	4006	8167	4507	2481	1434	7207	4130	460	2442	3305	536	7354	3921	4344	329	1548	4923
Acta2-CreERT; Bmpr1af/f Distal	838	1046	1961	3944	4372	3461	2262	4399	4439	721	1692	592	2457	3994	1339	1282	1479	1054	1076	2142	3136	3499	2816	1421	3011	1563	1154	1351	1543	4073	4534	5999	2703	1647	1879	1917	4903	1654	950	1157	1739	1759	373	4246	541	3189	2361	2723	1269
Acta2-CreERT; Bmpr1af/f Middle	928	2625	2481	3751	2218	7650	1411	5297	2350	1256	2191	1630	1173	3773	3942	3217	2049	1304	4045	4842	2505	4230	989	2042	569	522	5876	2333	1096	1880	365	830	419	622	5359	3591	1347	2319	1973	2125	1715	1419	6158	5414	1890	3061	6691	1343	3891
Acta2-CreERT; Bmpr1af/f Proximal	8833	1716	6364	1048	6161	2785	7803	1618	4569	4326	1958	7536	6617	4784	432	6919	4300	1152	4762	4336	9835	2629	2155	6594	6849	4362	1512	5854	4192	2493	9555	3948	7825	4957	1955	5193	913	718	1418	6646	8451	6999	856	3123	5801	7462	3571	4106	2912
Figure 3B
	Relative Bmpr1a level
Bmpr1af/f	0.945329	0.90682	1.16653
Prrx1CreERT; Bmpr1af/f	0.299831	0.279107	0.353281
Figure 3C
	Relative proportions of ear area
Bmpr1af/f	1.0139	0.965222	1.00096	1.01991
Prrx1CreERT; Bmpr1af/f	0.467451	0.68545	0.51663	0.639489
Figure 3D
	Thickness of the cartilage (μm)
Bmpr1af/f Distal	25.9615	24.5153	24.7386	25	28.8617	25.632	27.8926	24.7386	28.7924	25.7099	24.0416	23.5372	26.2488	25.7099	26.2488	20.2485	22.1359	24.5153	26.4764	24.7386	26.1725	24.5153	28.4429	27.4591	28.0713	28.0713	26.0192	26.1725	28.0713	25.1794	23.0868	27	24.0832	24	24.0208	23.0217	26	26.0192	26	23	27	25.0799	26.0768	22.2036	26.0192
Bmpr1af/f Middle	35.609	35.4683	34.0588	31.9061	36.3593	33.121	36.0555	38.4838	40.3113	38.2753	34.0588	35.805	40.2244	36.8782	37.2156	36.1248	37.1214	36.1248	37.2156	36.2215	35.1283	36.0555	35.1283	35.0571	35.0143	33.0605	35.0571	37.0135	37.0135	38.0132	32.249	32.28	35.3553	36.4966	37	39	39.0513	39.0128	37	37.3363	32.1403	38.0526	37	35	35.0571
Bmpr1af/f Proximal	59.8164	61.6198	60.4649	57.4282	51.8652	52.0865	52.0384	48.0104	61.6198	63.1269	60.1415	52.0096	49.0306	49.0408	51.0392	52	56.0089	53.0094	57.8706	62.9682	68.352	62.6498	62.6498	63.2456	63.9531	62.3699	63.3482	61.8466	58.4637	62.8013	55.9464	54.1295	55.4707	56.3649	57.9396	55.5428	59.2284	55.0091	56.5155	57.7235	60.0833	58.4209	59.5399	55.6597	57.7235
Prrx1CreERT; Bmpr1af/f Distal	18.6815	20.2237	26.3059	20.3961	18.7883	22.8035	24.3516	20.025	20.3961	23	23.1948	20.8806	23.4094	24.3516	23.7697	21.587	22.561	21.3776	25.4951	22.561	23.7697	23.5372	23.1948	21.3776	20.6155	23.0217	20.2237	21.0238	20	23.7697	20.6155	20.025	20.6155	22.8035	20.6155	19.2354	24.5968	22.2036	22.8254	25.7099	21.1896	22.4722	21.2132	18.0278	20.2237
Prrx1CreERT; Bmpr1af/f Middle	33.5261	34.4093	36.0555	31.241	33.1059	35.7771	31.6228	35.3836	35.7771	36.7151	39.4462	35.7771	31.305	40.2492	43.8634	28.178	27.4591	29.6816	31.6228	35.4683	33.2415	28.3196	33.9411	30	28.3019	36.6742	34.9285	32.3883	33.541	33.1361	33.4216	34.7131	36.6197	38.9487	34.8855	36.2353	36.3593	36.8917	36.4006	33.0151	29.5466	30.0167	35.3553	38.4708	38.0789
Prrx1CreERT; Bmpr1af/f Proximal	59.0932	53.8516	51.264	56.3205	56.921	55.7135	53.3667	55.3173	58.8558	63.1506	68.7314	58.3095	58.0345	56.921	58.2409	53.7122	55.9732	57.0088	58.4637	56.0892	56.8858	54.0833	56.0803	55.2268	53.6004	54.6443	54.6443	51.3128	54.9181	54.7083	49	48.0416	52	53.9352	58.4637	58.5235	57.9828	51.3128	53	52.6308	60.7454	59.8415	64.3817	66.2722	63.5059
Figure 3D
	Chondrocyte size (μm2)
Bmpr1af/f Distal	4252	2576	717	1644	4000	2288	1693	721	2972	194	2724	1572	717	2771	2587	864	702	1386	2528	1568	4485	819	325	1936	714	1998	3310	3800	1841	2530	2225	664	2272	810	5142	1348	1953	2041	3130	1950	1668	4338	2679	2101	720	4666	2251	2429	4248
Bmpr1af/f Middle	4129	2590	2027	370	7153	4965	949	1882	286	1103	7240	3351	3569	3225	5032	464	319	172	2917	3434	1923	82	5488	4901	237	3959	4159	2460	3840	160	2359	723	3755	2268	1372	1296	173	3443	3490	1713	4173	7503	1764	1175	235	237	1097	4734	3505
Bmpr1af/f Proximal	3302	8095	2430	1158	1236	1529	7501	982	3078	3499	5277	3716	2157	6852	1669	605	491	6902	4442	1215	3883	2933	260	10041	2093	5750	625	4647	1263	5437	1705	9084	1970	495	3018	6687	1143	2046	3760	2096	302	1810	10522	1384	159	3299	6503	5351	1892
Prrx1CreERT; Bmpr1af/f Distal	1100	823	776	1341	349	748	667	560	259	693	9	941	214	824	37	1528	1655	747	1092	2414	836	512	2380	992	1156	1060	1109	198	1488	754	626	429	387	97	321	415	2701	884	407	353	479	611	272	385	2635	1097	728	676	410
Prrx1CreERT; Bmpr1af/f Middle	2685	2925	3890	2410	3837	3973	196	1535	798	1392	6132	645	1897	2976	9	885	227	1382	580	312	2258	5548	162	749	388	1596	2941	706	2157	1149	3239	971	3991	1757	1010	755	381	1189	1072	2692	2720	933	590	1703	1564	5942	77	1690	1011
Prrx1CreERT; Bmpr1af/f Proximal	3593	4423	4121	810	4894	1046	3288	6080	8021	897	4610	1402	515	3609	3293	2698	1295	6953	5123	1925	3633	2938	5210	2897	429	6081	6399	4101	8118	1658	1263	5867	652	1652	2743	6490	4881	2233	2039	4656	4283	491	713	1067	3890	249	5055	3592	3829
Figure 4-figure supplement 1B
	Smad1,5,9 expression levels (FPKM)
	Bmpr1af/f			Prrx1CreERT; Bmpr1af/f
Smad1	24.73	24.22	21.31	22.1	24.17	26.63
Smad5	21.87	19.09	21.79	19.72	21.87	19.18
Smad9	0.98	1.03	0.97	1.44	2.37	1.11
Figure 4-figure supplement 1E
	ER stress-related genes (FPKM)
	Bmpr1af/f			Prrx1CreERT; Bmpr1af/f
Atf4	121.59	139.66	148.94	163.06	136.19	172.74
Hspa5	139.78	153.31	151.47	202.1	138	155.09
Xbp1	75.57	73.44	72.13	83.53	64.45	88.7
Atf6	7.98	7.49	9.31	7.9	8.12	8.93
Lamp1	285.53	319.49	307.87	302.34	312	294.13
Ern1	11.48	9.07	9.04	7.66	9.38	8.66
Figure 4-figure supplement 1F
	Golgi stress-related genes (FPKM)
	Bmpr1af/f			Prrx1CreERT; Bmpr1af/f
Creb3	41.22	40.87	34.71	38.39	35.02	36.48
Tfe3	19.24	18.44	23.13	21.05	17.23	22.11
Hsp47	35.28	46.19	44.07	39.16	31.63	23.76
Ets1	4.74	5.75	7.27	5.69	6.71	8.9
Perk	11.83	10.37	10.51	9.82	10.88	9.24
Figure5D1
	Fold change (Runx2/β-Actin)
Bmpr1af/f	1.10479	1.20362	0.691587
Prrx1CreERT; Bmpr1af/f	1.54108	1.50976	1.96628
Figure5D2
	Fold change (OCN/β-Actin)
Bmpr1af/f	1.05792	0.903819	1.03826
Prrx1CreERT; Bmpr1af/f	1.94513	1.73443	1.45396
Figure 5-figure supplement 1A
	Bmpr1af/f			Prrx1CreERT; Bmpr1af/f
Acan	26.22	28.77	28.94	14.95	23.3	20.17
Col11a1	6.98	9.93	9.44	4.62	7.4	3.4
Comp	69.34	97.01	81.14	56.54	68.42	34.12
Ecm1	143.72	129.17	140.47	112.16	102.34	69.83
Sfrp2	35.57	45.2	27.7	3.37	3.38	1.97
Smpd3	23	14.42	16.42	11.53	10.52	12.28
Pth1r	13.37	14.6	15.19	11.19	8.72	7
Scx	5.55	6.24	8.32	4.11	3.72	2.1
Col11a2	13.3	15.14	8.77	6.43	9.21	3.14
Col2a1	12.94	11.26	5.74	5.13	6.76	2.14
Col5a1	14.16	19.32	23.72	10.34	11.9	9.49
Col5a2	18.48	22	23.27	11.48	13.87	14.64
Wnt2b	1.08	1.01	1.04	0.72	0.7	0.37
Wnt5b	4.48	3.79	2.16	2.09	2.55	1.39
Mustn1	11.52	14.48	14.27	7.09	11.43	4.25
Figure 5-figure supplement 1B
	Relative Sox9 level (FPKM)
Bmpr1af/f	1.02756	1.03191	0.940537
Prrx1CreERT; Bmpr1af/f	1.00798	1.26469	1.03988
Figure 5-figure supplement 1C
	Relative Sox9 level
Bmpr1af/f	1.11858	1.01631	0.879649
Prrx1CreERT; Bmpr1af/f	1.01279	0.912776	0.791869
Figure6B
	Fold change (p-Creb/Creb)
Bmpr1af/f	1	1	1
Prrx1CreERT; Bmpr1af/f	1.32513	1.49442	1.57839
Figure6C
	Relative Adcy5 level
Bmpr1af/f	1.0562	0.859889	1.10106
Prrx1CreERT; Bmpr1af/f	2.49138	1.50989	1.89795
Figure6C
	Relative Adcy8 level
Bmpr1af/f	1.13725	0.861878	1.02023
Prrx1CreERT; Bmpr1af/f	1.3246	2.16178	1.99846
Figure7C
	Relative proportions of ear area
Bmpr1af/f	0.936358	0.990571	1.07307
Prrx1CreERT; Bmpr1af/f	0.50213	0.456617	0.478344
H89+Bmpr1af/f	1.0717	1.10535	1.02013
H89+Prrx1CreERT; Bmpr1af/f	0.780609	0.777449	0.711127
Figure7D
	Thickness of the cartilage (μm)
Bmpr1af/f	23.7697	22.0227	22.0227	21.0238	22.0227	23.0217	24.0832	23.0868	22.3607	21.2132	23.1948	21.0238	24	23.1948	22.0907	24.6982	26.9258	26.6271	24.7386	25.9615	26.6833	25.4951	26.3059	26.4764	26.6833	27.2947	25.1794	27.2947	26.0768	25.02	25.02	26.0192	26.0192	26	24.0208	24.0208	21	24.0208	24	23	26.0192	26.0192	23	26	23.0217
Prrx1CreERT; Bmpr1af/f	18.1108	20.0998	20.0998	19.105	17	19.0263	19.105	20	18.1108	19.105	20	22.0907	20.0998	23.0868	19	21.0238	21	20.025	19.105	20.0998	20.025	19.105	18.0278	18.1108	23	20	18.0278	22.0907	19.105	19.0263	23.5372	23.7697	21.0238	21.0238	22.0907	20.0998	23	22	22	22	22.0227	20	21	22	20.0998
H89+Bmpr1af/f	24.7386	27.8926	27.8926	27.2947	22.8035	25.4951	27.6586	24.3311	27.1662	26.9258	24.0208	24.1868	26.2488	26.1725	24	20.2485	21.1896	20.2485	21.587	23.0868	24.5153	25.2982	23.5372	21.5407	22.4722	22.8473	21.8403	21.1896	22.8473	24.1661	24.0208	23.3452	20.2483	20.105	20.2237	21.0238	20.025	26	25.02	24.0208	24.0208	23.0868	24.1868	24.0208	22.2036
H89+Prrx1CreERT; Bmpr1af/f	22.2036	23.5372	19.9249	21.587	23.3452	22.3607	22.0227	20	21.0238	21.2132	22.0907	21.0238	22.0907	20.025	24.0832	22.2036	24.3311	23.5372	23.4094	21.8403	20.3961	25.4951	21.095	23.0217	25.02	22.2036	24.0832	24.1868	24.0208	24.1868	23.0868	22.3607	22.8473	22.3607	22.8473	23.3452	22.561	24.3311	23.1948	23.0868	19.2354	21.2132	24.3311	21.587	23.1948
Figure7D
	Chondrocyte size (μm2)
Bmpr1af/f	3160	3270	964	3912	1306	4768	744	1456	1656	1385	2236	3868	2539	1245	3688	1483	3459	4188	676	530	2149	4111	1575	2519	2120	4806	1209	4593	2887	1963	928	930	3313	2952	1660	3431	1066	1113	678	355	342	216	843	2687	2600	4176	483	2230	907
Prrx1CreERT; Bmpr1af/f	2423	1736	266	170	468	853	1089	652	1917	662	277	1505	1428	338	324	163	728	10	173	613	265	886	804	272	664	271	302	502	465	1618	510	2674	521	3135	1286	359	562	1880	416	461	238	3217	2928	1411	1534	2905	2011	1044	1549
H89+Bmpr1af/f	2988	1600	1482	4267	1882	4620	679	2985	816	1727	1488	3475	3571	3205	522	2835	3312	2162	3713	464	2131	988	3759	1202	4800	726	2002	502	1043	1786	838	946	983	1286	659	2320	1401	1436	1264	800	1831	606	2159	1742	1900	2911	1440	765	2316
H89+Prrx1CreERT; Bmpr1af/f	2540	758	784	1570	1626	821	3146	805	340	2123	1825	2653	382	1276	2561	1336	1426	1349	2186	1084	1136	3709	1846	4171	2585	2003	998	2293	1316	934	708	1649	1800	4375	736	2702	1010	1924	134	494	1454	1254	4165	2426	4184	139	2055	2314	1882
Figure7G
	Fold change (Runx2/β-Actin)
Bmpr1af/f	0.863123	1.2708	0.866075
Prrx1CreERT; Bmpr1af/f	1.59714	1.5451	1.58674
H89+Bmpr1af/f	1.07244	1.2555	1.10138
H89+Prrx1CreERT; Bmpr1af/f	0.95238	0.884313	0.953535
Figure7G
	Fold change (OCN/β-Actin)
Bmpr1af/f	0.84673	1.16018	0.993092
Prrx1CreERT; Bmpr1af/f	1.62488	2.37495	1.79862
H89+Bmpr1af/f	0.747335	1.25929	1.26624
H89+Prrx1CreERT; Bmpr1af/f	0.86715	1.396	1.36921
[truncated: 161 more columns]
